# Supplementary material for: Outcome and Predictors for Mortality in Patients with Cardiogenic Shock: A Dutch Nationwide Registry-Based Study of 75,407 Patients with Acute Coronary Syndrome Treated by PCI
Source: MDPI journal article supplement (doi:10.3390/jcm10102047), 2021-05-11
Supplement: s1 [file s1]

## SUPPLEMENTARY MATERIALS

**Figure S1.** The ROC curve for classification according to the multivariable model for predicting mortality in patients with cardiogenic shock, AUC = 0.73.

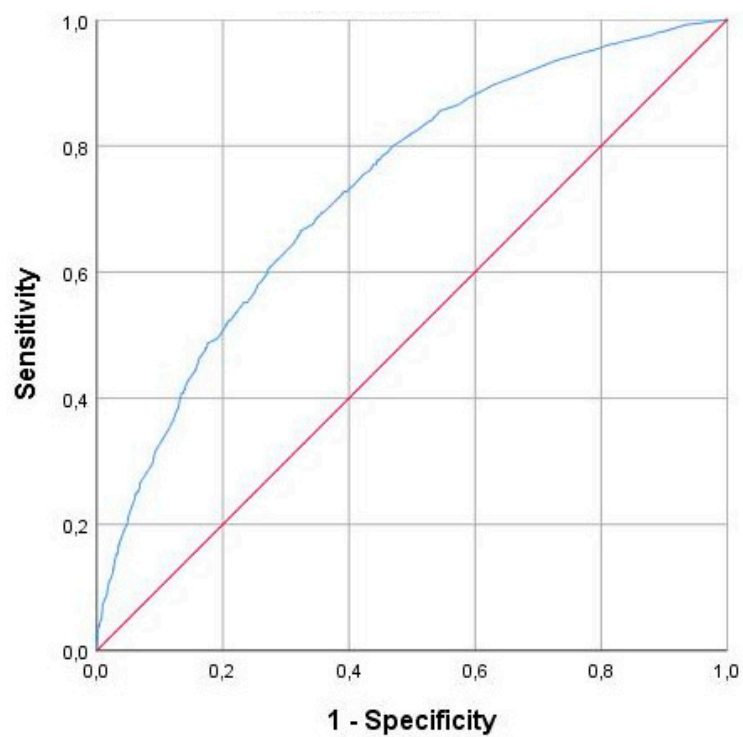

Diagonal segments are produced by ties.

**Table S1.** Results of univariable Cox regression analysis and multivariable model to predict mortality for patients with cardiogenic shock excluding patients who died before or at 30-days (N=1,916).

|                                    | Univariable |           |         | Multivariable |           |                  |
|------------------------------------|-------------|-----------|---------|---------------|-----------|------------------|
|                                    | HR          | 95% CI    | p-value | HR            | 95% CI    | p-value          |
| Age (years)                        | 1.05        | 1.04-1.07 | <0.001  | 1.04          | 1.02-1.05 | <b>&lt;0.001</b> |
| Male                               | 0.82        | 0.61-1.09 | 0.17    |               |           |                  |
| Diabetes mellitus                  | 2.28        | 1.68-3.09 | <0.001  | 1.66          | 1.19-2.31 | <b>&lt;0.01</b>  |
| Multivessel disease                | 2.17        | 1.61-2.94 | <0.001  | 1.47          | 1.06-2.04 | <b>0.02</b>      |
| CTO                                | 1.03        | 0.42-2.49 | 0.95    |               |           |                  |
| Prior MI                           | 2.61        | 1.94-3.52 | <0.001  | 1.95          | 1.40-2.71 | <b>&lt;0.001</b> |
| Prior CABG                         | 2.47        | 1.59-3.84 | <0.001  | 1.17          | 0.71-1.91 | 0.54             |
| eGFR (ml/min/1.73 m <sup>2</sup> ) | 0.98        | 0.98-0.99 | <0.001  | 0.99          | 0.99-1.00 | <b>0.02</b>      |
| OHCA                               | 0.70        | 0.52-0.93 | 0.02    | 0.92          | 0.67-1.26 | 0.61             |
| STEMI                              | 0.57        | 0.39-0.84 | <0.01   | 0.78          | 0.52-1.18 | 0.23             |
| PCI center                         | 0.88        | 0.64-1.20 | 0.40    |               |           |                  |
| Intervention year                  |             |           |         |               |           |                  |
| 2015                               | 1.00        | 0.64-1.55 | 0.98    |               |           |                  |
| 2016                               | 1.27        | 0.82-1.97 | 0.28    |               |           |                  |
| 2017                               | 1.10        | 0.71-1.71 | 0.67    |               |           |                  |

*Variables with  $p < 0.10$  in the univariable analysis were included in the multivariable model. STEMI vs NSTEMI; PCI center vs heart center; reference intervention year was 2018. CTO, chronic total occlusion; MI, myocardial infarction; CABG, coronary bypass grafting; eGFR, estimated glomerular filtration rate; STEMI, ST-segment elevation myocardial infarction; NSTEMI, non-ST-segment elevation myocardial infarction; PCI, percutaneous coronary intervention.*

**Figure S2.** Kaplan Meier curves showing survival of cardiogenic shock patients treated by PCI (n=3,082) per age category, log-rank  $p<0.001$ .

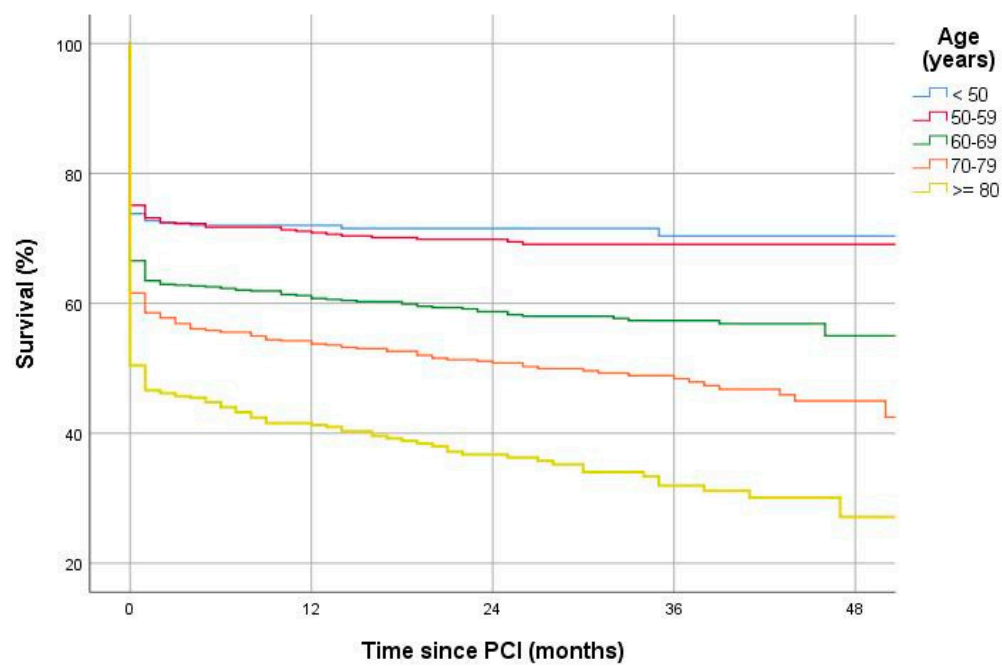

| Age   | No. at Risk |     |     |     |    |
|-------|-------------|-----|-----|-----|----|
| <50   | 294         | 160 | 101 | 58  | 15 |
| 50-59 | 590         | 319 | 201 | 126 | 46 |
| 60-69 | 864         | 409 | 265 | 142 | 49 |
| 70-79 | 794         | 336 | 202 | 102 | 35 |
| ≥80   | 454         | 139 | 82  | 44  | 8  |

**Figure S3.** Kaplan Meier curves showing survival of cardiogenic shock patients treated by PCI (n=3,082) according to renal function, log-rank  $p<0.001$ .

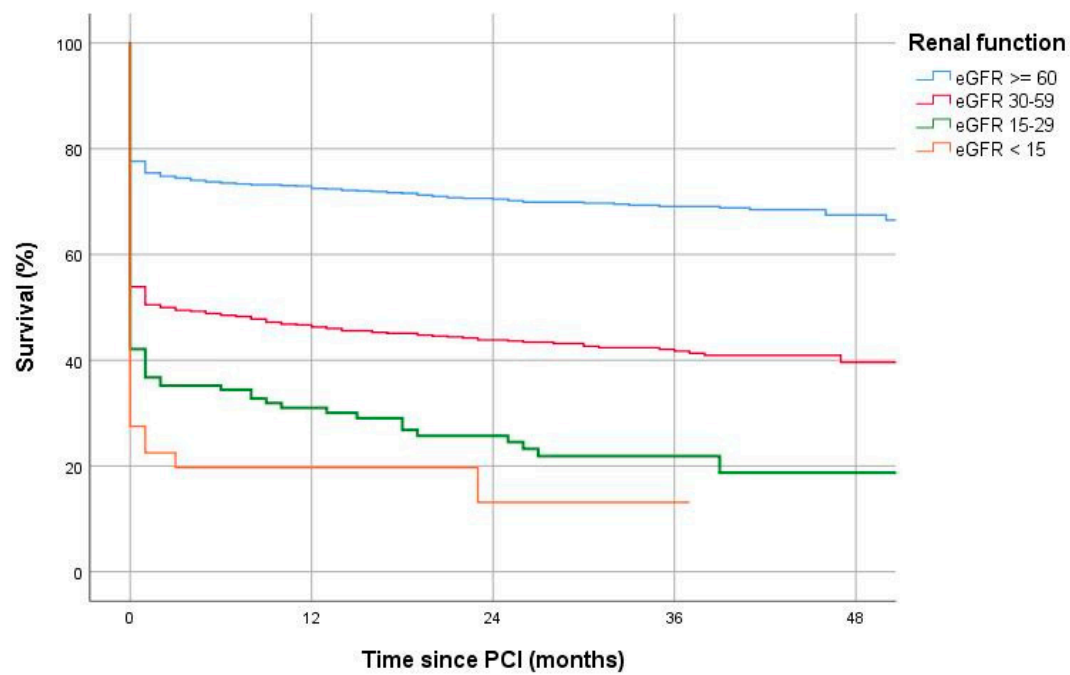

| eGFR                        | No. at Risk |     |     |     |     |
|-----------------------------|-------------|-----|-----|-----|-----|
| <b><math>\geq 60</math></b> | 1467        | 820 | 515 | 297 | 111 |
| <b>30-59</b>                | 991         | 347 | 225 | 120 | 27  |
| <b>15-29</b>                | 133         | 34  | 22  | 9   | 4   |
| <b><math>&lt; 15</math></b> | 40          | 6   | 2   | 1   | 0   |

**Figure S4.** Kaplan Meier curves showing survival of cardiogenic shock patients treated by PCI (n=3,082) for patients with and without OHCA, log-rank p<0.001.

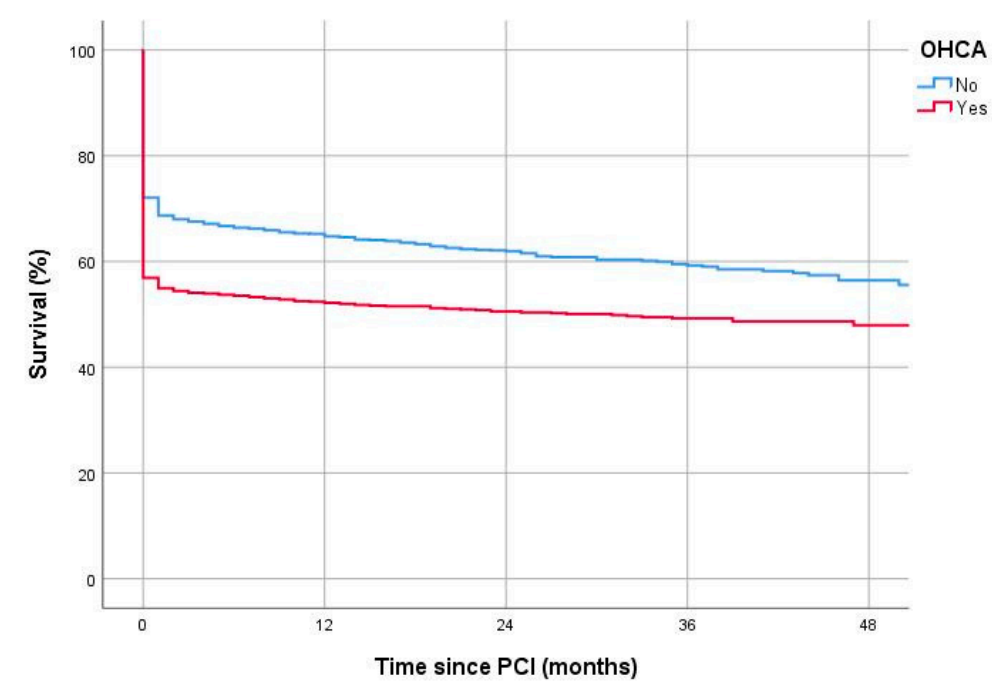

| OHCA | No. at Risk |     |     |     |    |
|------|-------------|-----|-----|-----|----|
| No   | 1635        | 818 | 483 | 262 | 97 |
| Yes  | 1355        | 542 | 365 | 208 | 56 |
